# Supplementary material for: Efficient enzyme-activated therapy based on the different locations of protein and prodrug in nanoMOFs
Source: Royal Society of Chemistry journal article supplement (doi:10.1039/d0tb01004a), 2020-01-01
Supplement: d0tb01004a1.pdf [file d0tb01004a1.pdf]

# Electronic Supplementary Information

## Efficient enzyme-activated therapy based on the different location of protein and prodrug in nanoMOFs

Fan Wang,<sup>a,b</sup> Jian Yang,<sup>a,b</sup> Yongsheng Li,<sup>a,b</sup> Qixin Zhuang<sup>a,b</sup> and Jinlou Gu<sup>\*,a,b</sup>

<sup>a</sup>Shanghai Engineering Research Center of Hierarchical Nanomaterials, School of Materials Science and Engineering, East China University of Science and Technology, Shanghai 200237, China

<sup>b</sup>Key Laboratory for Ultrafine Materials of Ministry of Education, School of Materials Science and Engineering, East China University of Science and Technology, Shanghai 200237, China

Fax: +86-21-64250740

E-mail: [jinlougu@ecust.edu.cn](mailto:jinlougu@ecust.edu.cn)

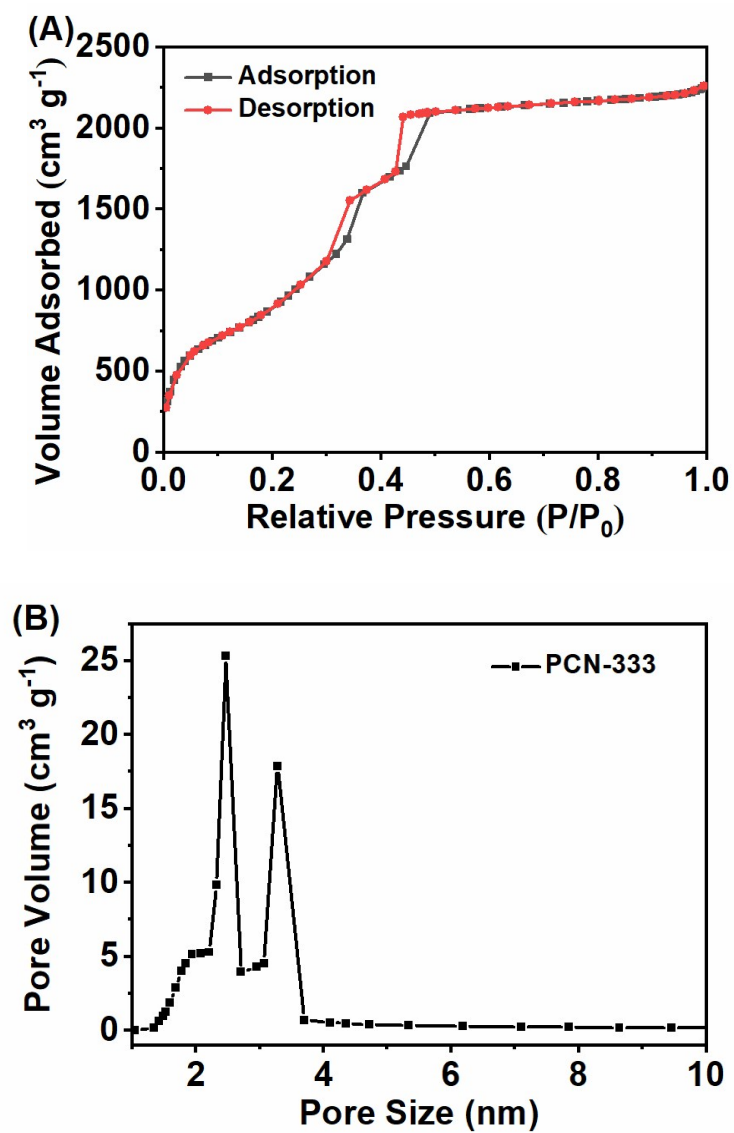

**Fig. S1** (A) Nitrogen adsorption–desorption isotherm and (B) the corresponding BJH pore size distribution profile of the PCN-333 prepared with TFA to  $\text{AlCl}_3 \cdot 6\text{H}_2\text{O}$  feed ratios of 10.5 equiv.

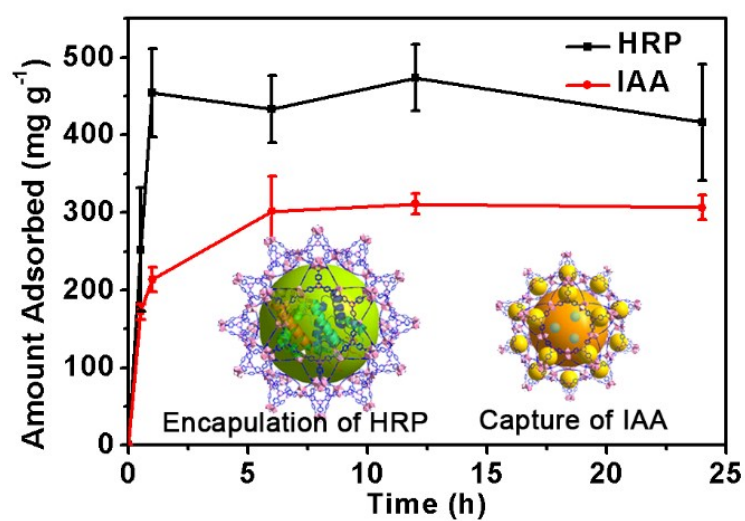

**Fig. S2** Adsorption profiles of PCN-333 for the loading of HRP (black line) and IAA (red line) in aqueous phase over various adsorption time.

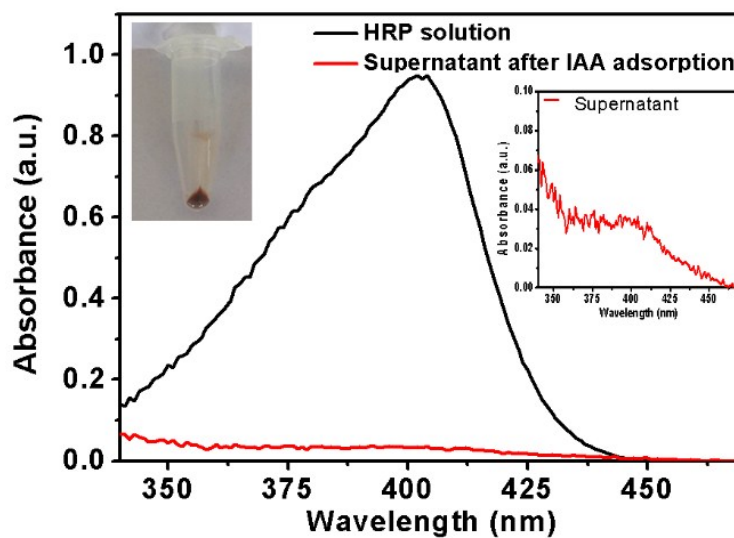

**Fig. S3** The UV-vis spectra of the HRP solution (Black line) and the supernatants after the adsorption of IAA by HRP@PCN-333 (Red line, concentrated in 5 times). The inset photographs illustrating the visible red color of IAA@HRP@PCN-333.

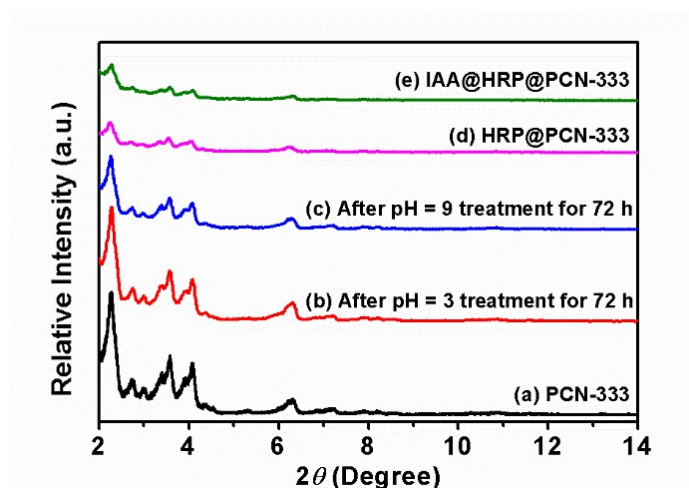

**Fig. S4** Powder XRD patterns of (a) the as-synthesized PCN-333 sample, PCN-333 upon the treatments in (b) acidic and (c) basic solutions, (d) HRP@PCN-333 as well as (e) IAA@HRP@PCN-333.

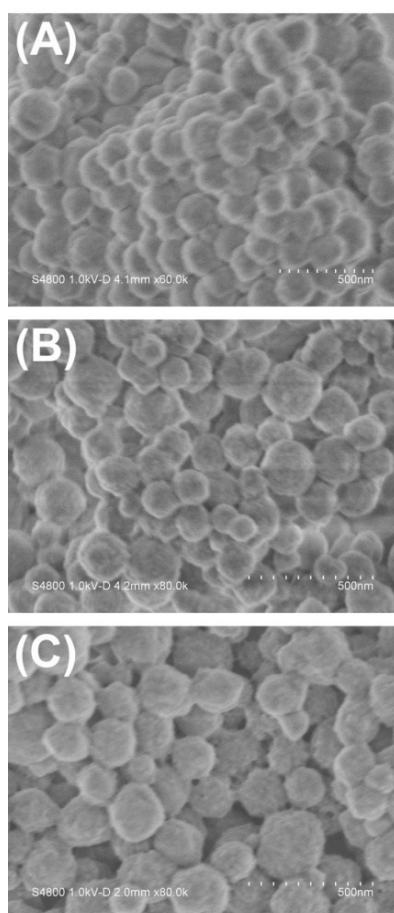

**Fig. S5** Magnified SEM images of (A) PCN-333, (B) HRP@PCN-333, and (C) IAA@HRP@PCN-333.

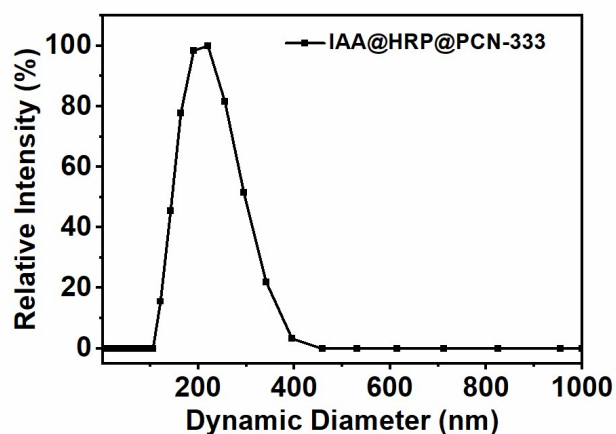

**Fig. S6** DLS profile of the IAA@HRP@PCN-333 in HEPES buffer solution (pH = 7.4, 20 mM).

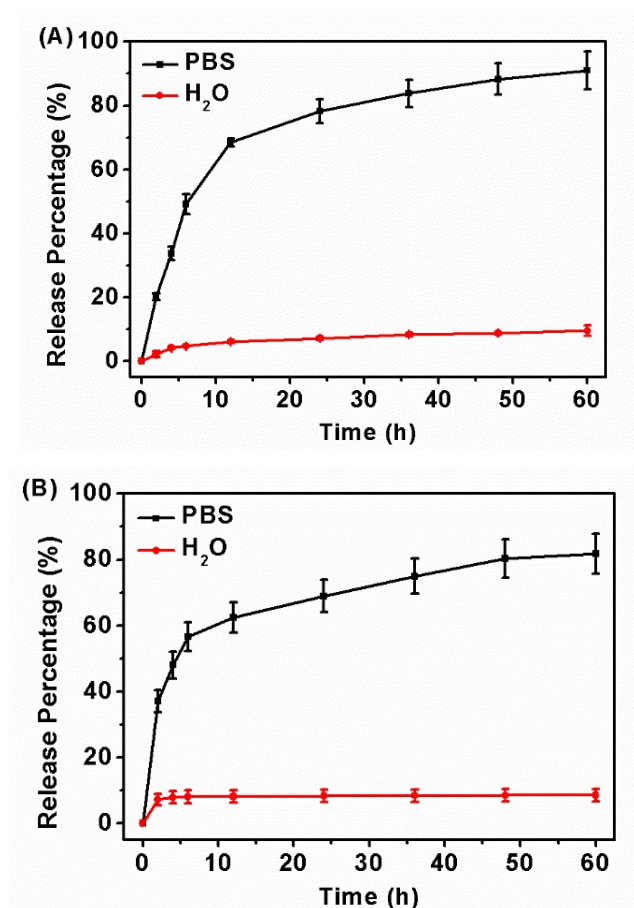

**Fig. S7** (A) HRP release profiles from PCN-333 nanocarriers at 37 °C in a PBS buffer (Black line, 10 mM, pH = 7.4) and water (Red line, pH = 7.4). (B) IAA release profiles from PCN-333 nanocarriers at 37 °C in a PBS buffer (Black line, 10 mM, pH = 7.4) and water (Red line, pH = 7.4).

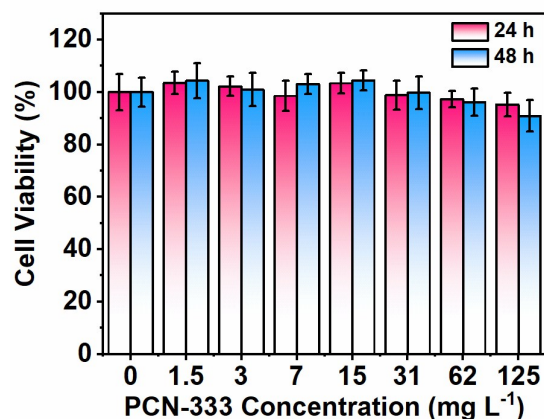

**Fig. S8** Cell viabilities of PCN-333 nanocarriers against SMMC-7721 cells at different concentrations with incubation time of 24 (Red) and 48 h (Blue).

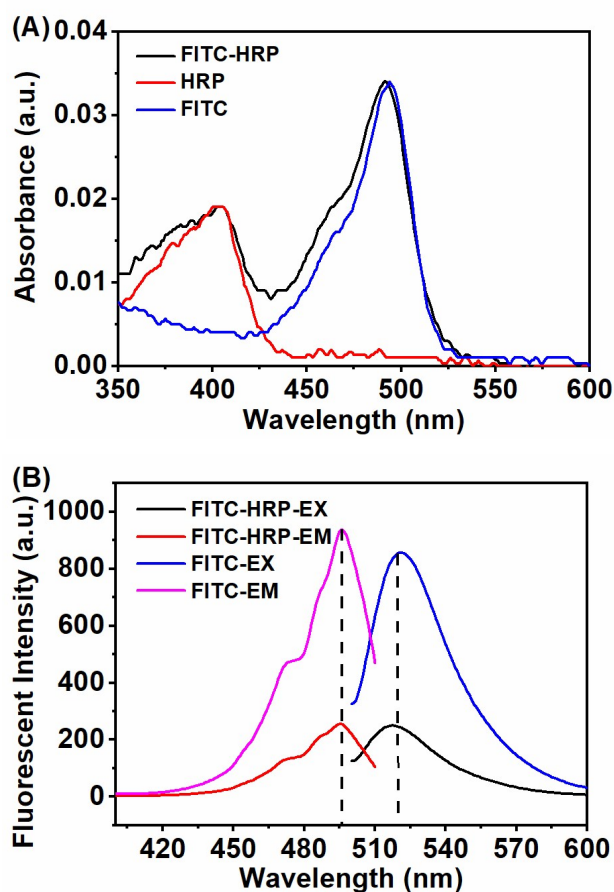

**Fig. S9** (A) UV-vis absorption spectra of FITC-HRP (15 mg L<sup>-1</sup>), HRP (15 mg L<sup>-1</sup>) and FITC (0.29 mg L<sup>-1</sup>) in HEPES buffer solution (pH = 7.4, 20 mM); (B) Fluorescence spectra and their corresponding excitation spectra of FITC-HRP (15mg L<sup>-1</sup>) and FITC (0.29 mg L<sup>-1</sup>) in HEPES buffer solution under excitation at 492 nm.



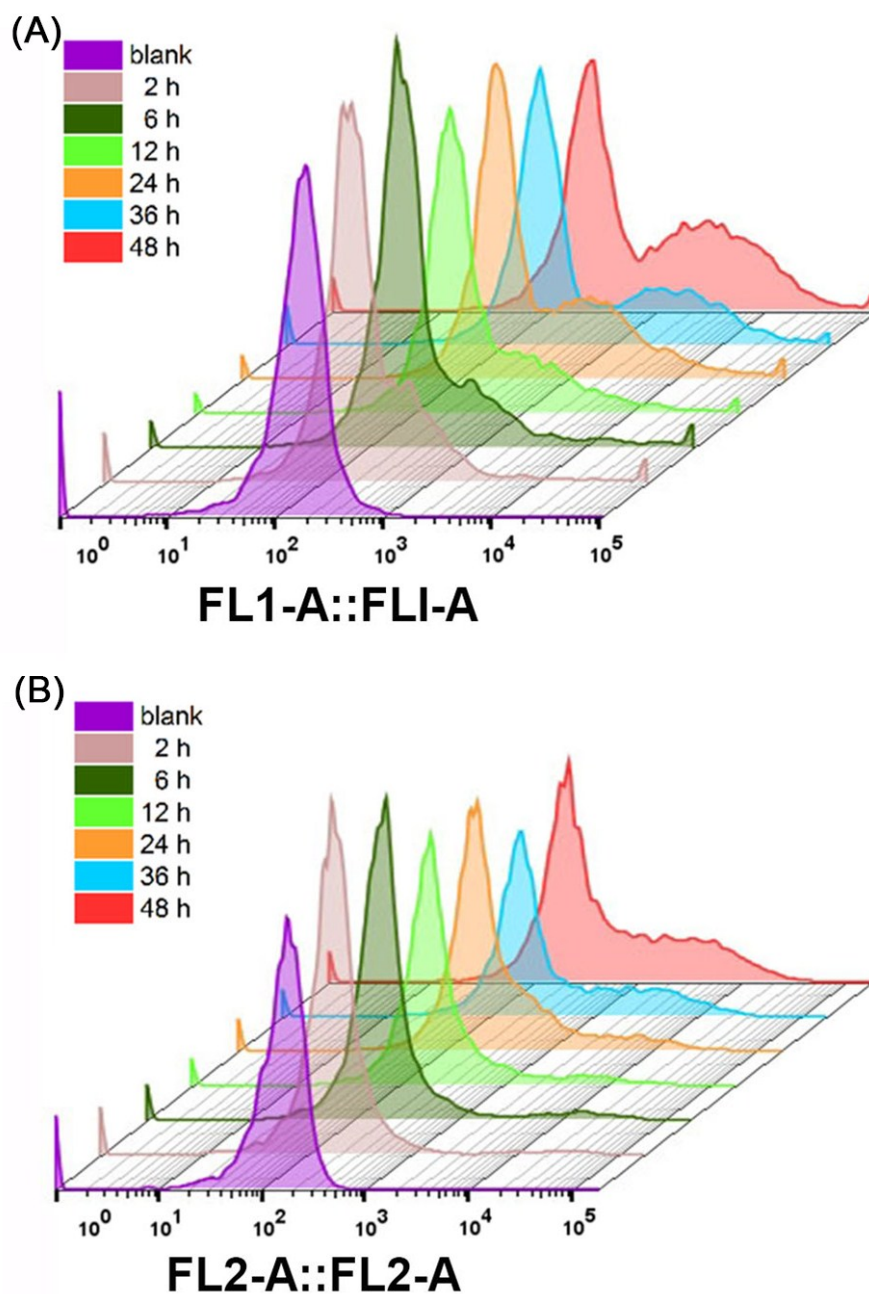

**Fig. S10** Flow cytometric analysis of (A) FITC-HRP and (B) RhB for SMMC-7721 cells after their incubation with RhB@FITC-HRP@PCN-333 NPs for 2, 6, 12, 24, 36 and 48 h at 37 °C.
